# Supplementary material for: Tunable valley splitting and anomalous valley Hall effect in VTe2/Ga2S3 heterostructures
Source: Royal Society of Chemistry journal article supplement (doi:10.1039/d0tc03712e), 2020-01-01
Supplement: d0tc03712e1.pdf [file d0tc03712e1.pdf]

*Supporting Information for*

Tunable valley splitting in  $VTe_2/Ga_2S_3$   
antiferromagnetic/ferroelectric heterostructures

Xikui Ma, Xiaofei Shao, Yingcai Fan, Jian Liu\*, Xukun Feng, Lei Sun, Mingwen

Zhao\*

*School of Physics & State Key Laboratory of Crystal Materials, Shandong University,*

*Jinan 250100, Shandong, China*

\*Corresponding authors: [liujian2019phd@gmail.com](mailto:liujian2019phd@gmail.com) (J. Liu); [zmw@sdu.edu.cn](mailto:zmw@sdu.edu.cn) (M. Zhao)

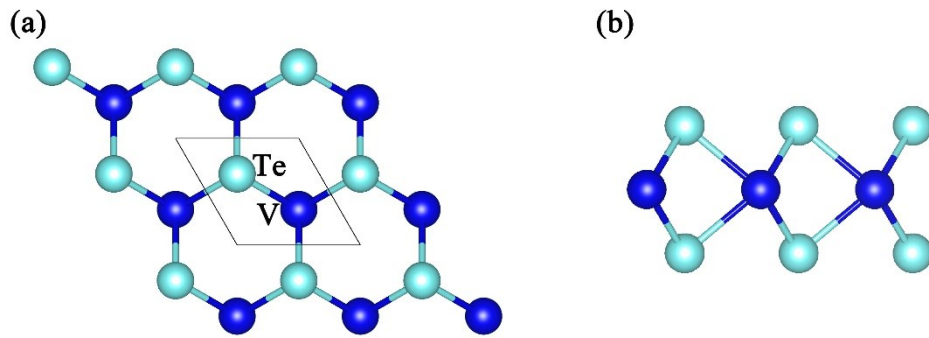

**Fig. S1** (a) and (b) The top view and side view of VTe<sub>2</sub> monolayer, respectively. The blue and azure balls represent the V and Te atoms, respectively.

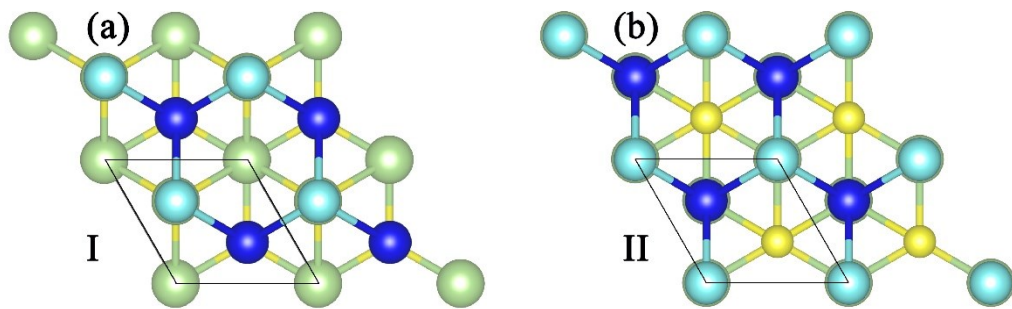

**Fig. S2** The heterostructure of antiferrovalley bilayer VTe<sub>2</sub> and Ga<sub>2</sub>S<sub>3</sub> monolayer of label I (a) II (b) in main text.

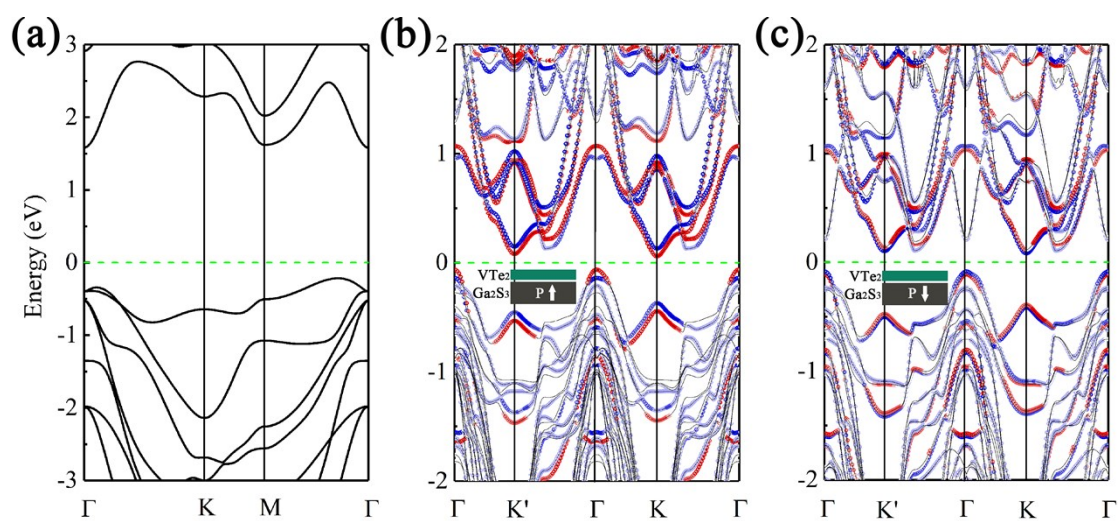

**Fig. S3** (a) The band structure of pristine  $\text{Ga}_2\text{S}_3$  monolayer. (b) and (c) The band structures of heterostructure  $\text{VTe}_2/\text{Ga}_2\text{S}_3$  with opposite direction of ferroelectric polarization. The circles represent the  $\text{VTe}_2$  component and the red and blue represent the spin up and spin down. The insets in (a) and (b) are schematic of our system with opposite ferroelectric polarization.

**Table SI** The parameters (in eV) of the  $k\cdot p$  model of the  $\text{VTe}_2/\text{Ga}_2\text{S}_3$  heterostructures obtained by fitting the DFT band structures.  $n$  is the layer numbers of the ferroelectric substrate. The parameters of the upper and lower layers of the  $\text{VTe}_2$  bilayer are presented, respectively.

| $\Delta$ | $t_{12}$ | $\lambda_c$ | $\lambda_v$ | $M_c$ | $M_v$ |
|----------|----------|-------------|-------------|-------|-------|
| 0.361    | 0.313    | -0.010      | 0.043       | 0.546 | 0.710 |

  

| $n$      | $\epsilon$   |              | $t_{cc}$     |              | $t_{vv}$     |              | $U$          |              |
|----------|--------------|--------------|--------------|--------------|--------------|--------------|--------------|--------------|
|          | <i>upper</i> | <i>lower</i> | <i>upper</i> | <i>lower</i> | <i>upper</i> | <i>lower</i> | <i>upper</i> | <i>lower</i> |
| <b>1</b> | 0.500        | 0.500        | 0.170        | 0.170        | 0.297        | 0.297        | 0.077        | -0.036       |
| <b>2</b> | 0.450        | 0.653        | 0.190        | 0.170        | 0.297        | 0.287        | 0.117        | -0.079       |
| <b>3</b> | 0.437        | 0.656        | 0.194        | 0.170        | 0.297        | 0.287        | 0.130        | -0.091       |
| <b>4</b> | 0.430        | 0.658        | 0.194        | 0.170        | 0.297        | 0.287        | 0.141        | -0.105       |
